# Supplementary material for: Polymorphs and stoichiometric variants of crown ether-based molecular complexes: exploring the landscape of conformational flexibility and supramolecular interactions
Source: Royal Society of Chemistry journal article supplement (doi:10.1039/d5ce00025d), 2025-01-01
Supplement: d5ce00025d1.pdf [file d5ce00025d1.pdf]

**Polymorphs and stoichiometric variants of crown ether-based molecular complexes. Exploring the landscape of conformational flexibility and supramolecular interactions**

Cinu Winson,<sup>a</sup> Saravanan Kandasamy,<sup>c</sup> Indira S. Divya,<sup>ab</sup> Krzysztof Wozniak<sup>c</sup>  
and Sunil Varughese<sup>ab</sup>

**Supporting Information**

## Experimental

The compounds such as crown ethers (DCH and CE), dithioamide (DTX), dinitroaniline (DNA), and the perfluorohalocarbons were procured from Aldrich, India and were used for crystallization without further purification. The solvents used for crystallization were of HPLC grade, and a slow evaporation mode of crystallization was adopted. In a typical synthesis of the multicomponent systems, the respective crown ether was milled along with dithioamide or dinitroaniline in the presence/absence of the perfluorohalocarbons. The milling was performed in a Labindia ball mill MM1100 for 15 minutes. The milled materials were crystallized from various solvents and solvent-mixtures.

**Single crystal X-ray Diffraction:** Fine single crystals were used for X-ray diffraction studies at 100 K and mounted on MiTeGen micro-mounts with paratone-N oil. The diffraction data were collected on an Agilent Technologies SuperNova Dual Source diffractometer with Cu K $\alpha$  radiation ( $\lambda = 1.54184 \text{ \AA}$ ) equipped with an HyPix-6000HE hybrid pixel two-dimensional detector. CrysAlis Pro software (CrysAlisPRO, Oxford Diffraction/Agilent Technologies UK Ltd, Yarnton, England) was used to process the data sets. In addition, the data sets were corrected for Lorenz and polarization effects. All crystal structures were solved by direct methods and subsequently refined with full-matrix least-squares on  $F^2$ , applying SHELXL with the graphical interface of the Olex<sup>2</sup>.

**Hirshfeld surface analysis:** Hirshfeld surface 2D fingerprint plot was constructed using Crystal Explorer (Ver. 17.5, University of Western Australia). The intermolecular interaction and energy frameworks were calculated at B3LYP/6-31G(d,p) level of dispersion-corrected density functional theory basis set. The energy framework was constructed based on the total intermolecular interaction energy, including electrostatic, polarization, dispersion and exchange-repulsion components.

**Full Interaction Maps (FIMs):** The FIMs analysis was performed using Mercury as the structure visualizer. The interaction maps of uncharged NH and OH of water were analyzed in the context of crystal packing. The interaction maps indicate hydrogen bond donors (blue) and acceptors (red), respectively.

**Thermal Analysis:** The thermal stability and decomposition profile of the crystalline compounds were measured using a Mettler TGA 2 thermogravimetric analyzer, with a heating rate of 5 °C/min under a nitrogen atmosphere.

**Molecular Electrostatic Potential (MESP) Analysis:** Theoretical calculations were carried out in Gaussian 16. We optimized the molecules and calculated their single-point energy with a DFT method at the level of B3LYP/6-311+G(d,p). Individual molecules were visualized in GaussView 6.0.

**Conformational Studies:** The molecular conformation and the point groups were analysed using VMD 1.9.4a53 software suite and the embedded Symmetry Tool.

**Table S1** Crystallographic Information

| Compound                                   | DTX-I                                                                                                               | DTX-II                                                                                                              | DTX-III                                                                                        | DTX-IV                                                                                                          | DNA-I                                                                                                               | DNA-II                                                                                                              | DNA-III                                                                                                              |
|--------------------------------------------|---------------------------------------------------------------------------------------------------------------------|---------------------------------------------------------------------------------------------------------------------|------------------------------------------------------------------------------------------------|-----------------------------------------------------------------------------------------------------------------|---------------------------------------------------------------------------------------------------------------------|---------------------------------------------------------------------------------------------------------------------|----------------------------------------------------------------------------------------------------------------------|
| <b>Formula</b>                             | C <sub>20</sub> H <sub>36</sub> O <sub>6</sub> ,<br>2(C <sub>2</sub> H <sub>4</sub> N <sub>2</sub> S <sub>2</sub> ) | C <sub>20</sub> H <sub>36</sub> O <sub>6</sub> ,<br>2(C <sub>2</sub> H <sub>4</sub> N <sub>2</sub> S <sub>2</sub> ) | C <sub>20</sub> H <sub>36</sub> O <sub>6</sub> ,<br>2(CH <sub>2</sub> NS),<br>H <sub>2</sub> O | C <sub>20</sub> H <sub>36</sub> O <sub>6</sub> ;<br>C <sub>2</sub> H <sub>4</sub> N <sub>2</sub> S <sub>2</sub> | C <sub>20</sub> H <sub>36</sub> O <sub>6</sub> ;<br>2(C <sub>6</sub> H <sub>5</sub> N <sub>3</sub> O <sub>4</sub> ) | C <sub>20</sub> H <sub>36</sub> O <sub>6</sub> ;<br>2(C <sub>6</sub> H <sub>5</sub> N <sub>3</sub> O <sub>4</sub> ) | C <sub>20</sub> H <sub>36</sub> O <sub>6</sub> ;<br>2(C <sub>6</sub> H <sub>5</sub> N <sub>3</sub> O <sub>4</sub> ), |
| <b>Ratio</b>                               | 1:2                                                                                                                 | 1:2                                                                                                                 | 1:2(0.5):1                                                                                     | 1:1                                                                                                             | 1:2                                                                                                                 | 1:2                                                                                                                 | 1:2                                                                                                                  |
| <b>CCDC Nos.</b>                           | AJUXIM                                                                                                              | AJUXOS                                                                                                              | 2412481                                                                                        | 2412480                                                                                                         | 2412478                                                                                                             | 2412479                                                                                                             | 2412482                                                                                                              |
| <b>Formula Wt.</b>                         |                                                                                                                     |                                                                                                                     | 510.720                                                                                        | 492.705                                                                                                         | 738.754                                                                                                             | 738.75                                                                                                              | 492.705                                                                                                              |
| <b>Crystal habit</b>                       |                                                                                                                     |                                                                                                                     | Acicular                                                                                       | Acicular                                                                                                        | Block                                                                                                               | Block                                                                                                               | Block                                                                                                                |
| <b>Crystal colour</b>                      |                                                                                                                     |                                                                                                                     | Red                                                                                            | Red                                                                                                             | Yellow                                                                                                              | Yellow                                                                                                              | Yellow                                                                                                               |
| <b>Crystal system</b>                      | Monoclinic                                                                                                          | Monoclinic                                                                                                          | Monoclinic                                                                                     | Triclinic                                                                                                       | Monoclinic                                                                                                          | Triclinic                                                                                                           | Triclinic                                                                                                            |
| <b>Space group</b>                         | <i>C2/c</i>                                                                                                         | <i>P2<sub>1</sub>/n</i>                                                                                             | <i>P2<sub>1</sub>/c</i>                                                                        | <i>P<math>\bar{1}</math></i>                                                                                    | <i>P2<sub>1</sub>/c</i>                                                                                             | <i>P<math>\bar{1}</math></i>                                                                                        | <i>P<math>\bar{1}</math></i>                                                                                         |
| <b>a (Å)</b>                               | 23.720(1)                                                                                                           | 12.654(3)                                                                                                           | 8.189(1)                                                                                       | 10.1460(2)                                                                                                      | 7.5430(1)                                                                                                           | 8.3820(1)                                                                                                           | 11.5000(1)                                                                                                           |
| <b>b (Å)</b>                               | 7.655(2)                                                                                                            | 7.5700(15)                                                                                                          | 14.730(1)                                                                                      | 14.1440(3)                                                                                                      | 11.8220(1)                                                                                                          | 11.4920(2)                                                                                                          | 16.7610(2)                                                                                                           |
| <b>c (Å)</b>                               | 18.364(3)                                                                                                           | 17.129(3)                                                                                                           | 21.856(2)                                                                                      | 14.5050(3)                                                                                                      | 20.0720(2)                                                                                                          | 19.2230(3)                                                                                                          | 19.5890(2)                                                                                                           |
| <b>α (°)</b>                               | 90                                                                                                                  | 90                                                                                                                  | 90                                                                                             | 91.7000(19)                                                                                                     | 90                                                                                                                  | 86.229(2)                                                                                                           | 104.953(1)                                                                                                           |
| <b>β (°)</b>                               | 106.98(6)                                                                                                           | 106.14(3)                                                                                                           | 90.56(1)                                                                                       | 105.5010(19)                                                                                                    | 99.410(1)                                                                                                           | 80.130(1)                                                                                                           | 91.171(1)                                                                                                            |
| <b>γ (°)</b>                               | 90                                                                                                                  | 90                                                                                                                  | 90                                                                                             | 101.171(2)                                                                                                      | 90                                                                                                                  | 84.865(2)                                                                                                           | 95.137(1)                                                                                                            |
| <b>V (Å<sup>3</sup>)</b>                   |                                                                                                                     |                                                                                                                     | 2636.23(4)                                                                                     | 1960.51(8)                                                                                                      | 1765.80(3)                                                                                                          | 1765.80(3)                                                                                                          | 3629.58(7)                                                                                                           |
| <b>Z</b>                                   | 4                                                                                                                   | 2                                                                                                                   | 4                                                                                              | 3                                                                                                               | 2                                                                                                                   | 2                                                                                                                   | 4                                                                                                                    |
| <b>D<sub>calc</sub>(g cm<sup>-3</sup>)</b> |                                                                                                                     |                                                                                                                     | 1.287                                                                                          | 1.252                                                                                                           | 1.389                                                                                                               | 1.352                                                                                                               | 1.352                                                                                                                |
| <b>T(K)</b>                                |                                                                                                                     |                                                                                                                     | 100(2)                                                                                         | 100(2)                                                                                                          | 100(2)                                                                                                              | 100(2)                                                                                                              | 100(2)                                                                                                               |
| <b>(λ)Cu Kα</b>                            |                                                                                                                     |                                                                                                                     | 1.54184                                                                                        | 1.54184                                                                                                         | 1.54184                                                                                                             | 1.54184                                                                                                             | 1.54184                                                                                                              |
| <b>μ(mm<sup>-1</sup>)</b>                  |                                                                                                                     |                                                                                                                     | 2.188                                                                                          | 2.160                                                                                                           | 0.929                                                                                                               | 0.904                                                                                                               | 0.904                                                                                                                |
| <b>2θ range (°)</b>                        |                                                                                                                     |                                                                                                                     | 155.02                                                                                         | 155.38                                                                                                          | 155.18                                                                                                              | 155.5                                                                                                               | 155.36                                                                                                               |
| <b>Total Reflns.</b>                       |                                                                                                                     |                                                                                                                     | 60133                                                                                          | 47546                                                                                                           | 41039                                                                                                               | 42169                                                                                                               | 99456                                                                                                                |
| <b>Unique Reflns.</b>                      |                                                                                                                     |                                                                                                                     | 5565                                                                                           | 8228                                                                                                            | 3752                                                                                                                | 7616                                                                                                                | 15273                                                                                                                |
| <b>Reflns. Used</b>                        |                                                                                                                     |                                                                                                                     | 5139                                                                                           | 7384                                                                                                            | 3355                                                                                                                | 6603                                                                                                                | 13540                                                                                                                |
| <b>No. Parameters</b>                      |                                                                                                                     |                                                                                                                     | 324                                                                                            | 456                                                                                                             | 235                                                                                                                 | 485                                                                                                                 | 944                                                                                                                  |
| <b>GOF on F<sup>2</sup></b>                |                                                                                                                     |                                                                                                                     | 1.0307                                                                                         | 1.0237                                                                                                          | 1.0273                                                                                                              | 1.0473                                                                                                              | 1.0377                                                                                                               |
| <b>Final R1, wR2</b>                       |                                                                                                                     |                                                                                                                     | 0.0319,<br>0.0808                                                                              | 0.0416,<br>0.1125                                                                                               | 0.0365,<br>0.0934                                                                                                   | 0.0600,<br>0.1544                                                                                                   | 0.0455,<br>0.1465                                                                                                    |

**Table S1** Crystallographic Information (Contd...)

| Compound                                       | CE-I                                                                                                                                     | C6                                                                                                                | T-I                                                                                                                                                                  |
|------------------------------------------------|------------------------------------------------------------------------------------------------------------------------------------------|-------------------------------------------------------------------------------------------------------------------|----------------------------------------------------------------------------------------------------------------------------------------------------------------------|
| Formula                                        | C <sub>12</sub> H <sub>24</sub> O <sub>6</sub> ,<br>C <sub>2</sub> H <sub>4</sub> N <sub>2</sub> S <sub>2</sub> ,<br>2(H <sub>2</sub> O) | C <sub>12</sub> H <sub>24</sub> O <sub>6</sub><br>2(C <sub>2</sub> H <sub>4</sub> N <sub>2</sub> S <sub>2</sub> ) | C <sub>20</sub> H <sub>36</sub> O <sub>6</sub> ;<br>2(C <sub>6</sub> H <sub>5</sub> N <sub>3</sub> O <sub>4</sub> );<br>C <sub>6</sub> F <sub>4</sub> I <sub>2</sub> |
| Ratio                                          | 1:1:2H <sub>2</sub> O                                                                                                                    | 1:2                                                                                                               | 1:2:1                                                                                                                                                                |
| CCDC Nos.                                      | 2412475                                                                                                                                  | 2412476                                                                                                           | 2412477                                                                                                                                                              |
| Formula Wt.                                    | 420.551                                                                                                                                  | 504.720                                                                                                           | 1140.623                                                                                                                                                             |
| Crystal habit                                  | Block                                                                                                                                    | Block                                                                                                             | Block                                                                                                                                                                |
| Crystal colour                                 | Red                                                                                                                                      | Yellow                                                                                                            | Yellow                                                                                                                                                               |
| Crystal system                                 | Triclinic                                                                                                                                | Monoclinic                                                                                                        | Triclinic                                                                                                                                                            |
| Space group                                    | <i>P</i> $\bar{1}$                                                                                                                       | <i>P</i> 2 <sub>1</sub> / <i>n</i>                                                                                | <i>P</i> $\bar{1}$                                                                                                                                                   |
| <i>a</i> (Å)                                   | 7.3962(3)                                                                                                                                | 8.5145(2)                                                                                                         | 10.5860(3)                                                                                                                                                           |
| <i>b</i> (Å)                                   | 7.7483(3)                                                                                                                                | 14.7946(3)                                                                                                        | 11.3120(4)                                                                                                                                                           |
| <i>c</i> (Å)                                   | 10.1053(3)                                                                                                                               | 10.0414(2)                                                                                                        | 11.3900(4)                                                                                                                                                           |
| $\alpha$ (°)                                   | 74.404(3)                                                                                                                                | 90                                                                                                                | 68.084(3)                                                                                                                                                            |
| $\beta$ (°)                                    | 72.510(3)                                                                                                                                | 104.389(2)                                                                                                        | 66.508(3)                                                                                                                                                            |
| $\gamma$ (°)                                   | 75.828(3)                                                                                                                                | 90                                                                                                                | 64.091(3)                                                                                                                                                            |
| <i>V</i> (Å <sup>3</sup> )                     | 523.46(4)                                                                                                                                | 1225.22(5)                                                                                                        | 1091.91(7)                                                                                                                                                           |
| <i>Z</i>                                       | 1                                                                                                                                        | 2                                                                                                                 | 1                                                                                                                                                                    |
| <i>D</i> <sub>calc</sub> (g cm <sup>-3</sup> ) | 1.334                                                                                                                                    | 1.368                                                                                                             | 1.735                                                                                                                                                                |
| <i>T</i> (K)                                   | 100(2)                                                                                                                                   | 100(2)                                                                                                            | 100(2)                                                                                                                                                               |
| ( $\lambda$ )Cu K $\alpha$                     | 1.54184                                                                                                                                  | 1.54184                                                                                                           | 1.54184                                                                                                                                                              |
| $\mu$ (mm <sup>-1</sup> )                      | 2.674                                                                                                                                    | 3.895                                                                                                             | 12.103                                                                                                                                                               |
| 2 $\theta$ range (°)                           | 155.26                                                                                                                                   | 156.00                                                                                                            | 154.84                                                                                                                                                               |
| Total Reflns.                                  | 9294                                                                                                                                     | 25884                                                                                                             | 22539                                                                                                                                                                |
| Unique Reflns.                                 | 2186                                                                                                                                     | 2606                                                                                                              | 4573                                                                                                                                                                 |
| Reflns. Used                                   | 2136                                                                                                                                     | 2442                                                                                                              | 4461                                                                                                                                                                 |
| No. Parameters                                 | 126                                                                                                                                      | 143                                                                                                               | 306                                                                                                                                                                  |
| GOF on <i>F</i> <sup>2</sup>                   | 1.0517                                                                                                                                   | 1.0475                                                                                                            | 1.0417                                                                                                                                                               |
| Final <i>R</i> 1, <i>wR</i> 2                  | 0.0306, 0.0884                                                                                                                           | 0.0313, 0.0861                                                                                                    | 0.0674, 0.1793                                                                                                                                                       |

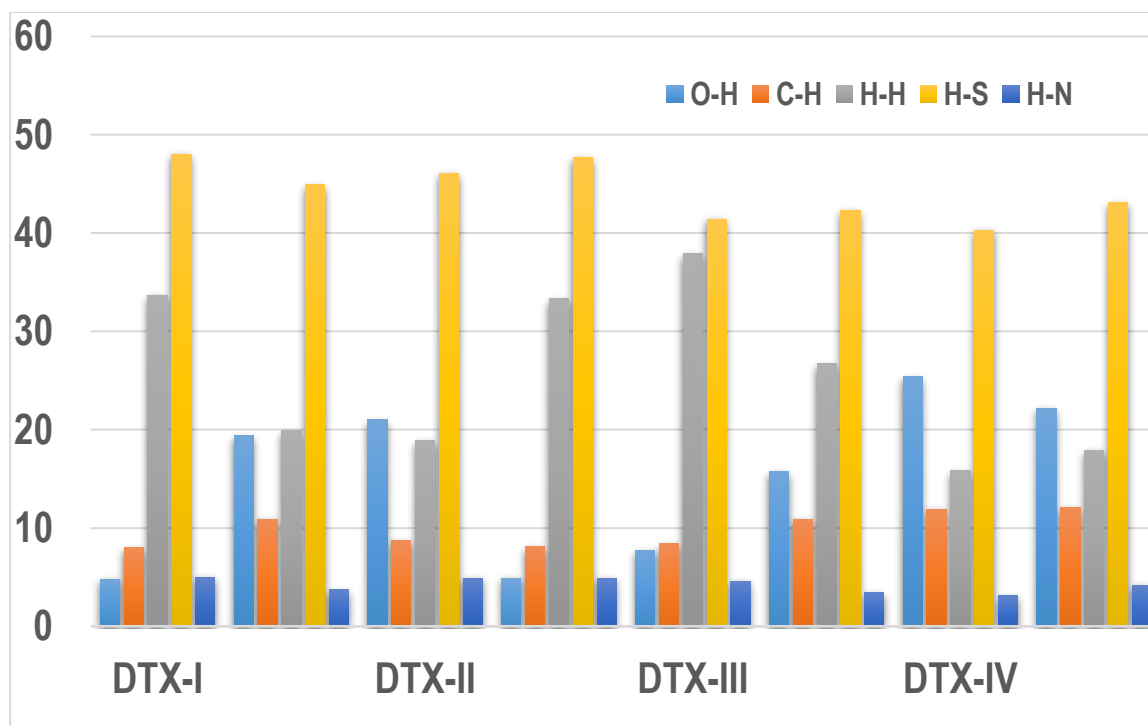

**Fig. S1** Relative contribution of various interaction types in the complexes of DTX.

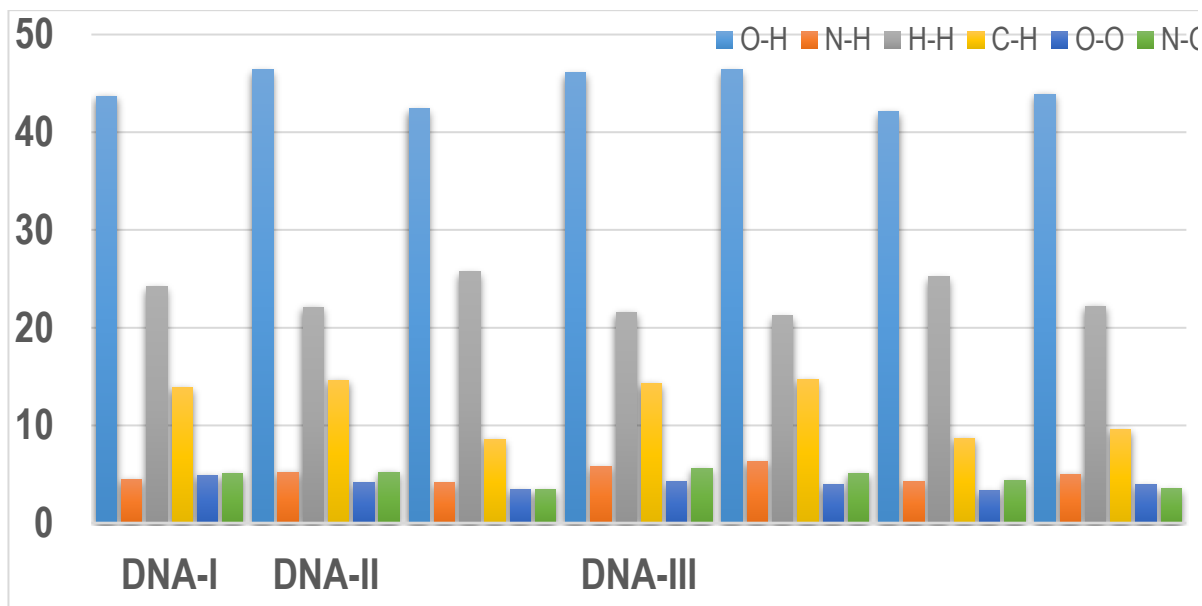

**Fig. S2** Relative contribution of various interaction types in the complexes of DNA.

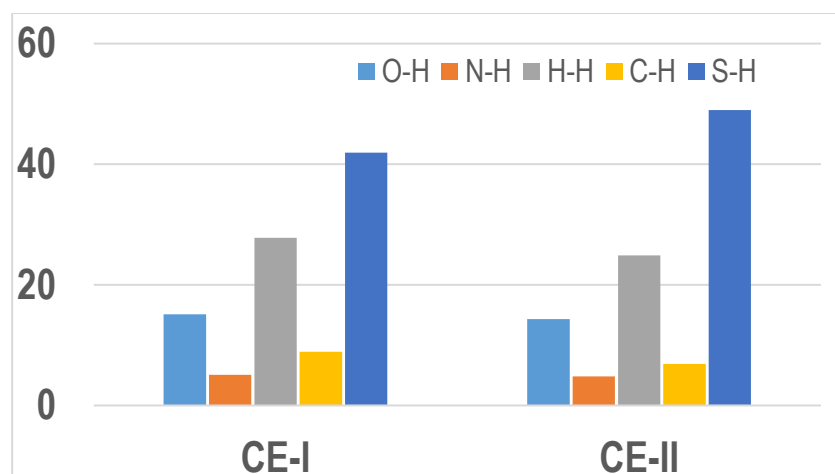

**Fig. S3** Relative contribution of various interaction types in the complexes of CE.

## DTX-I

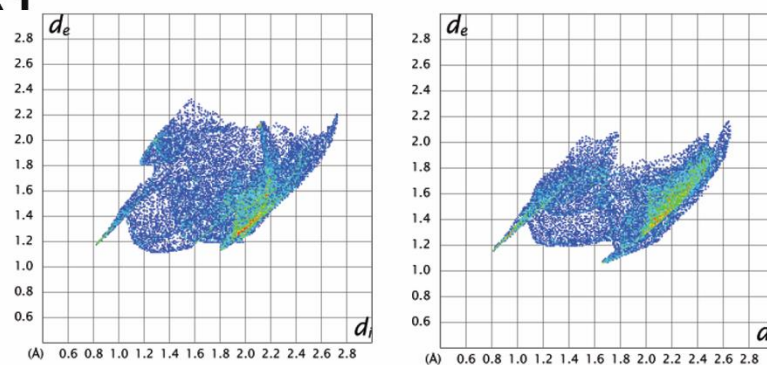

## DTX-II

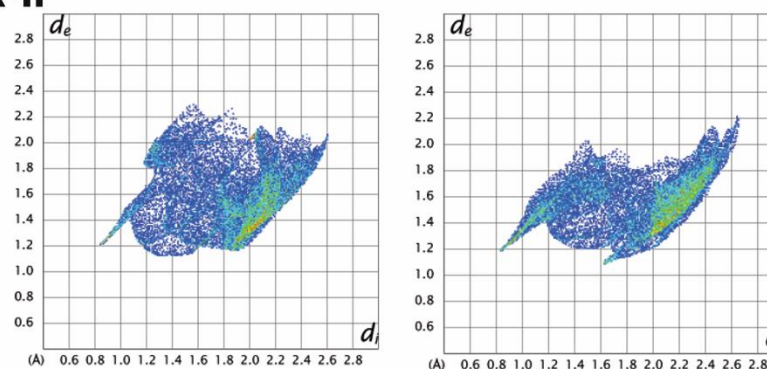

## DTX-III

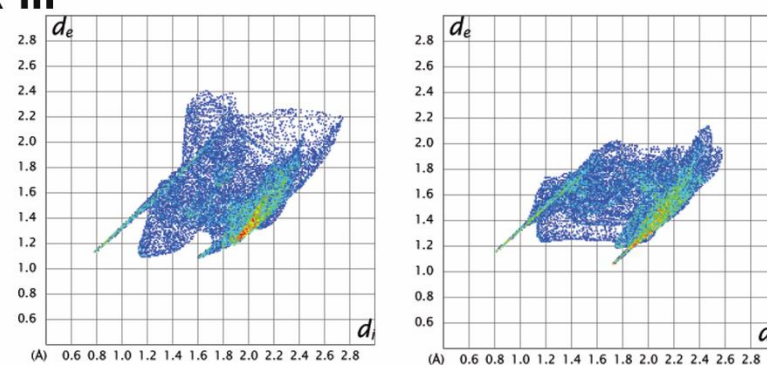

## DTX-IV

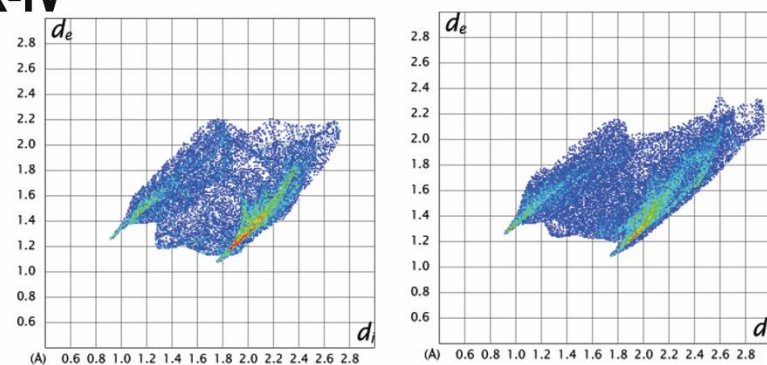

**Fig. S4** Fingerprint plots of the DTX moieties in the complexes with DCH.

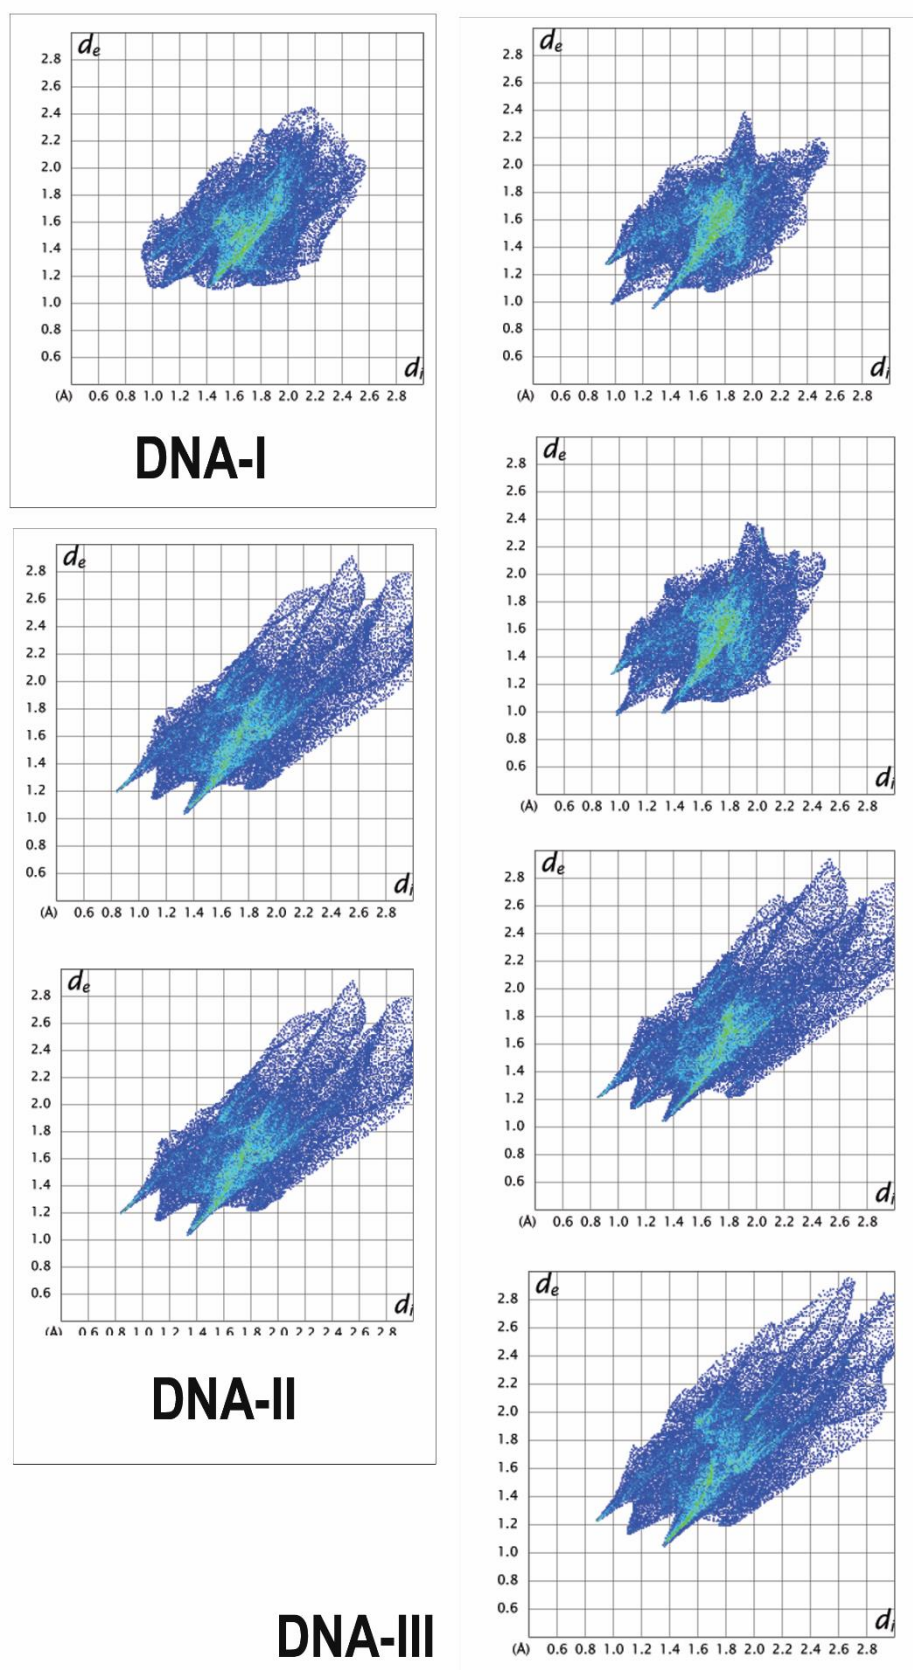

**Fig. S5** Fingerprint plots of the DNA moiety in its complexes with DCH.



DTX-I

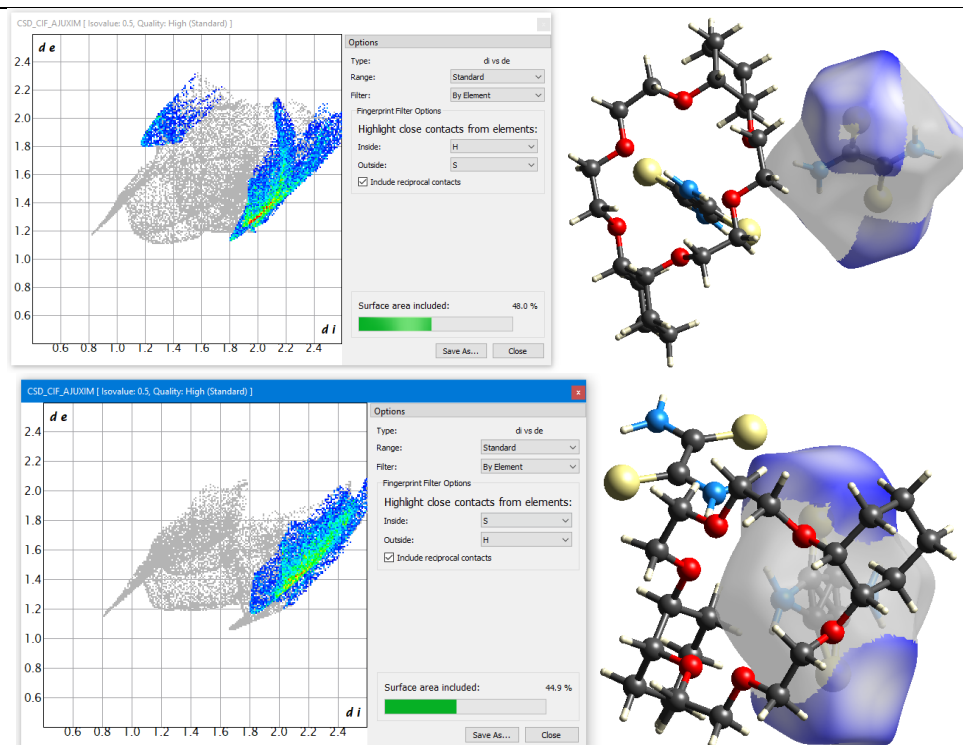

DTX-II

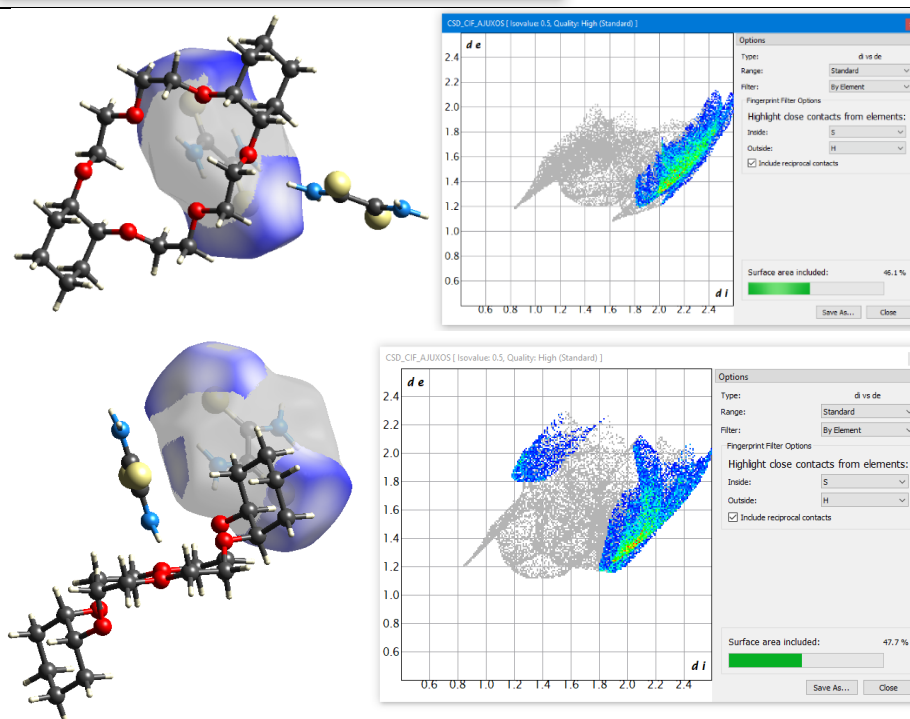

DTX-III

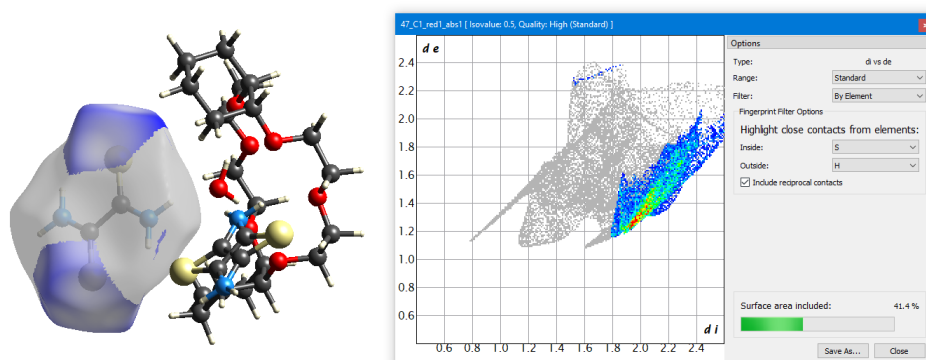

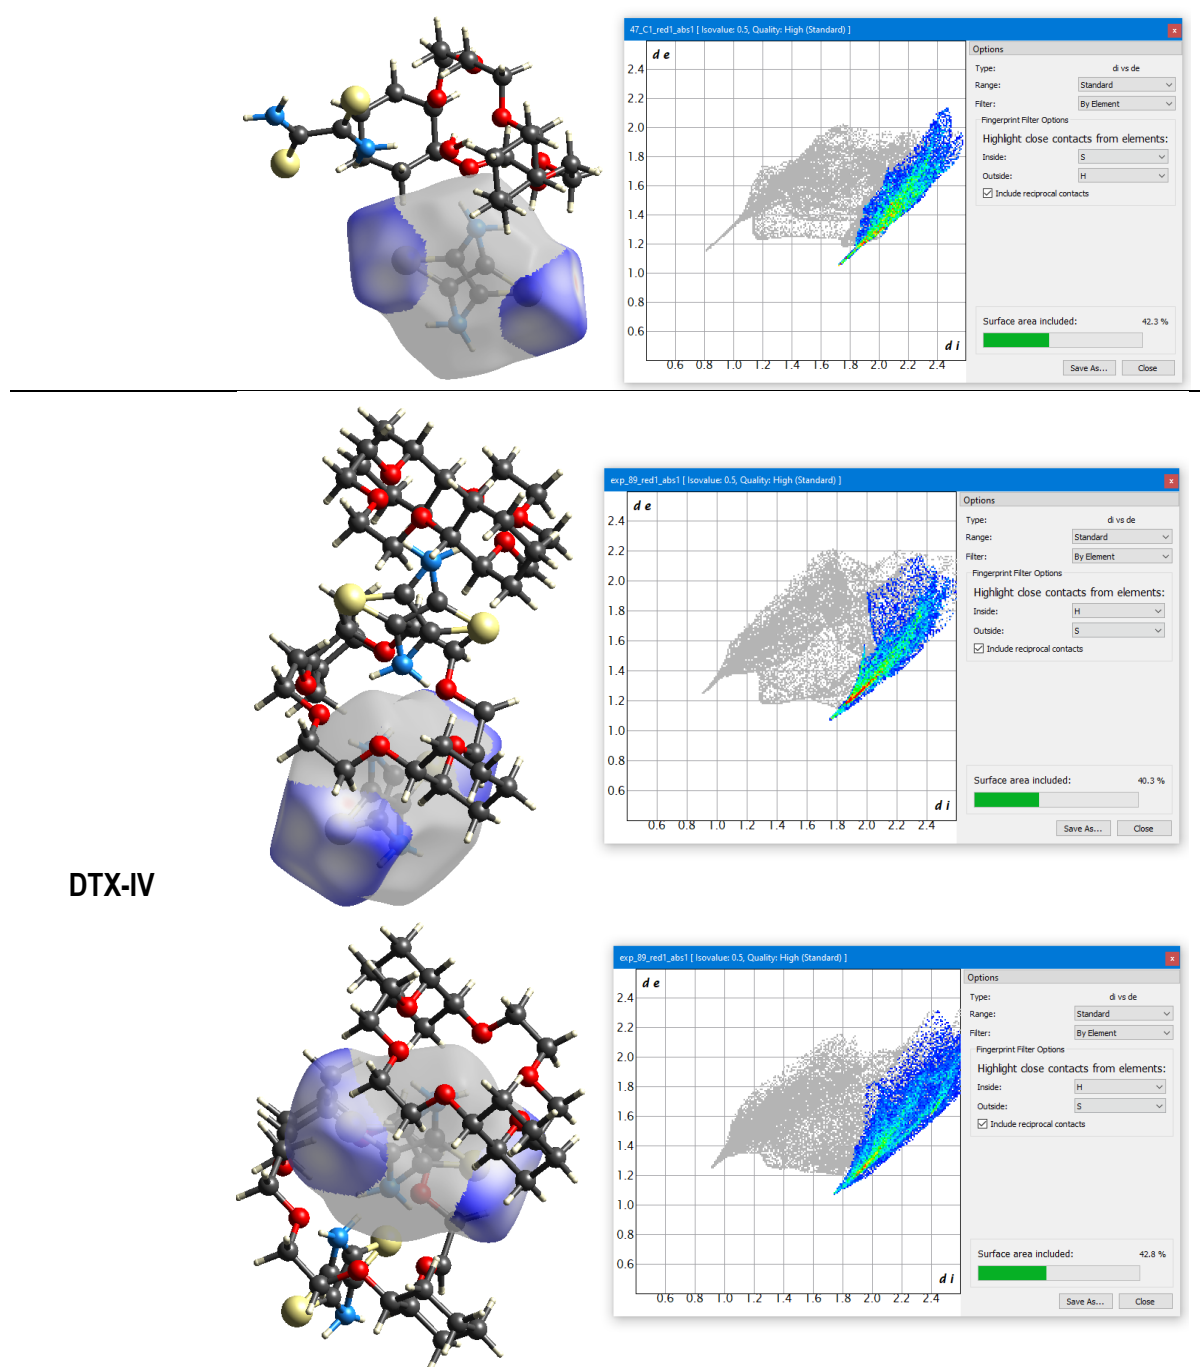

**Fig. S6** The S...H interactions in the DTX complexes and the corresponding fingerprint plots

DNA-I

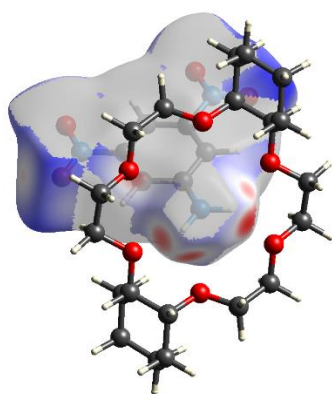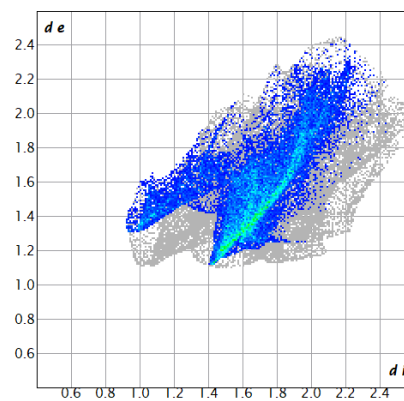

DNA-II

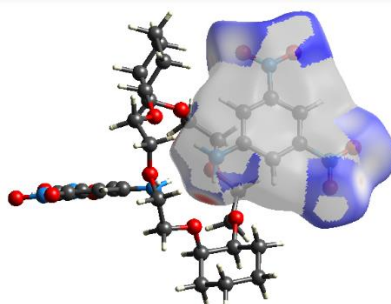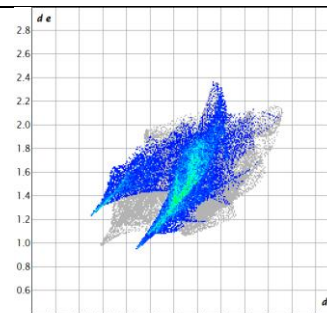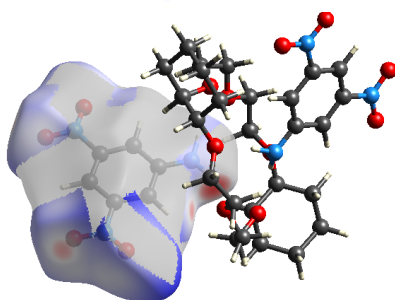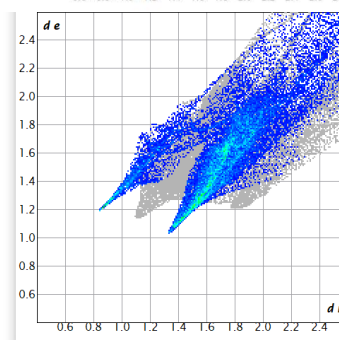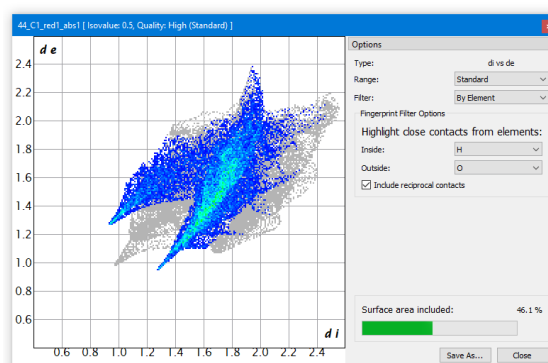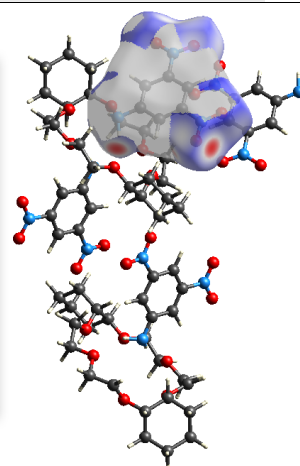

DNA-III

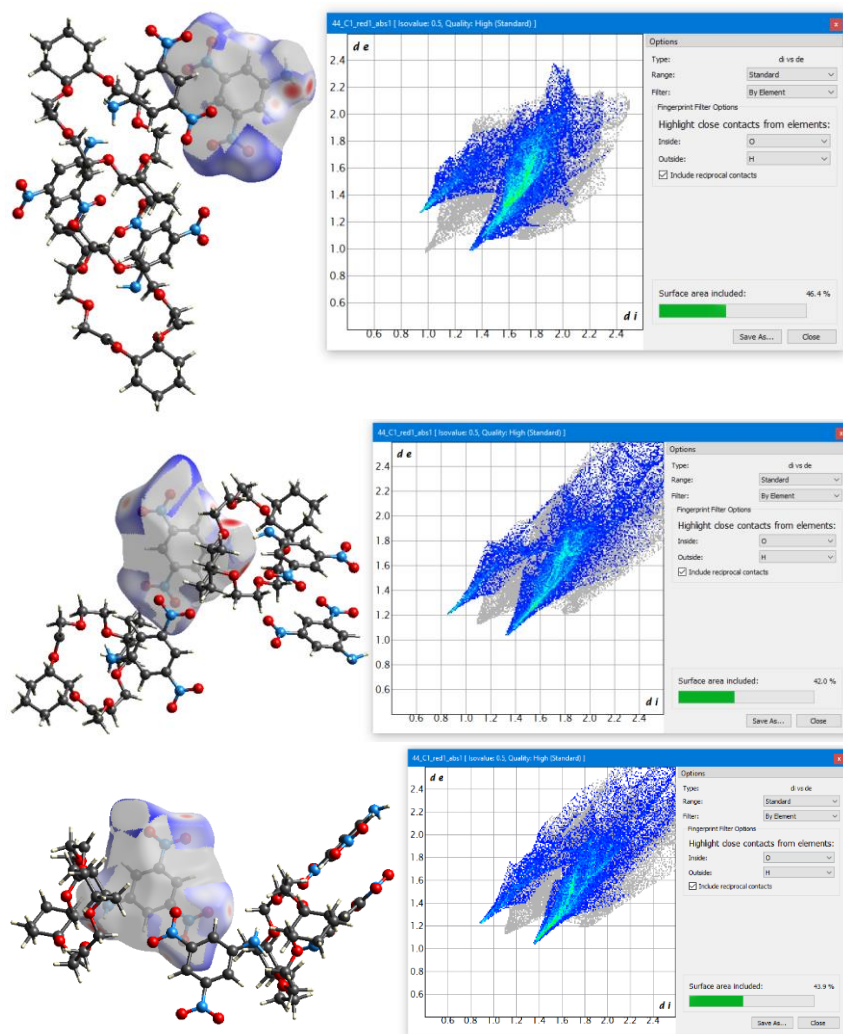

**Fig. S6** The O $\cdots$ H interactions in the DNA complexes and the corresponding fingerprint plots

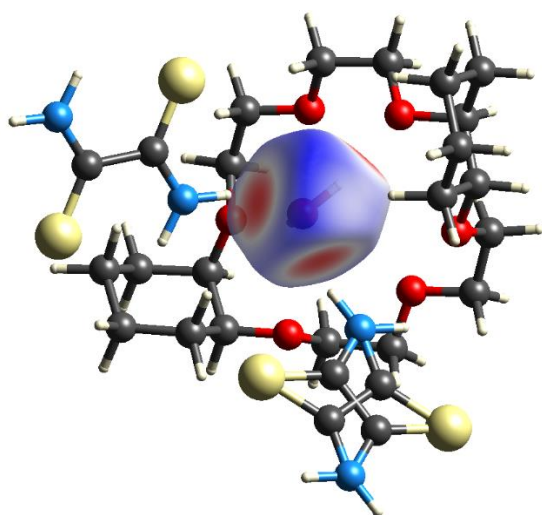

DTX-III

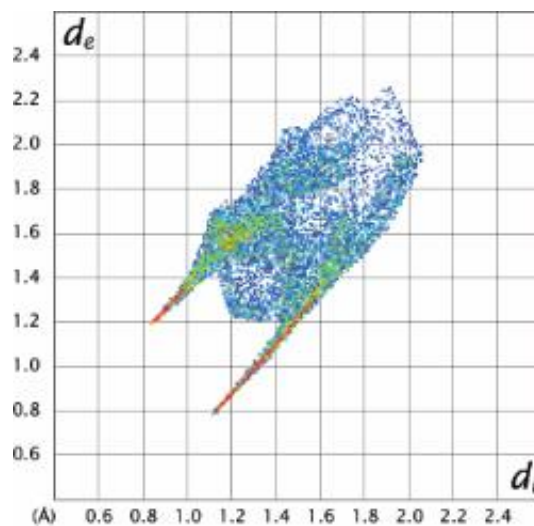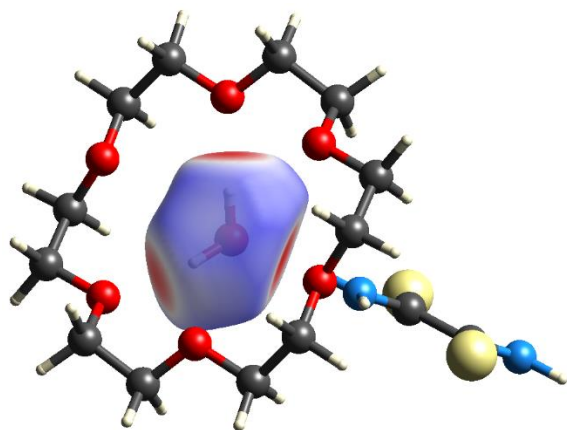

C6-I

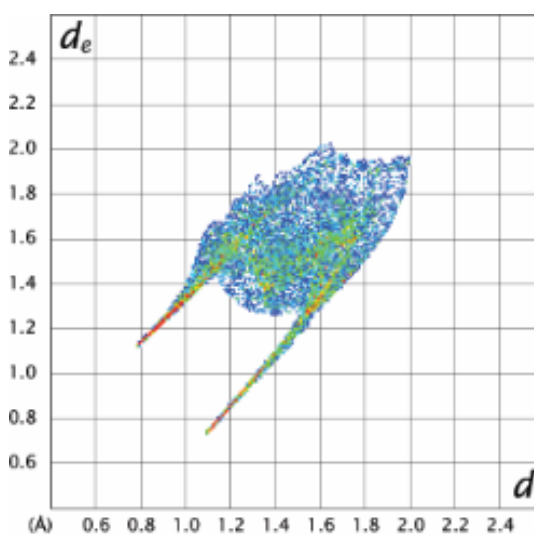

**Fig. S6** The ESP surface and the fingerprint plots of water in the hydrated systems (DTX-III and C6-I).



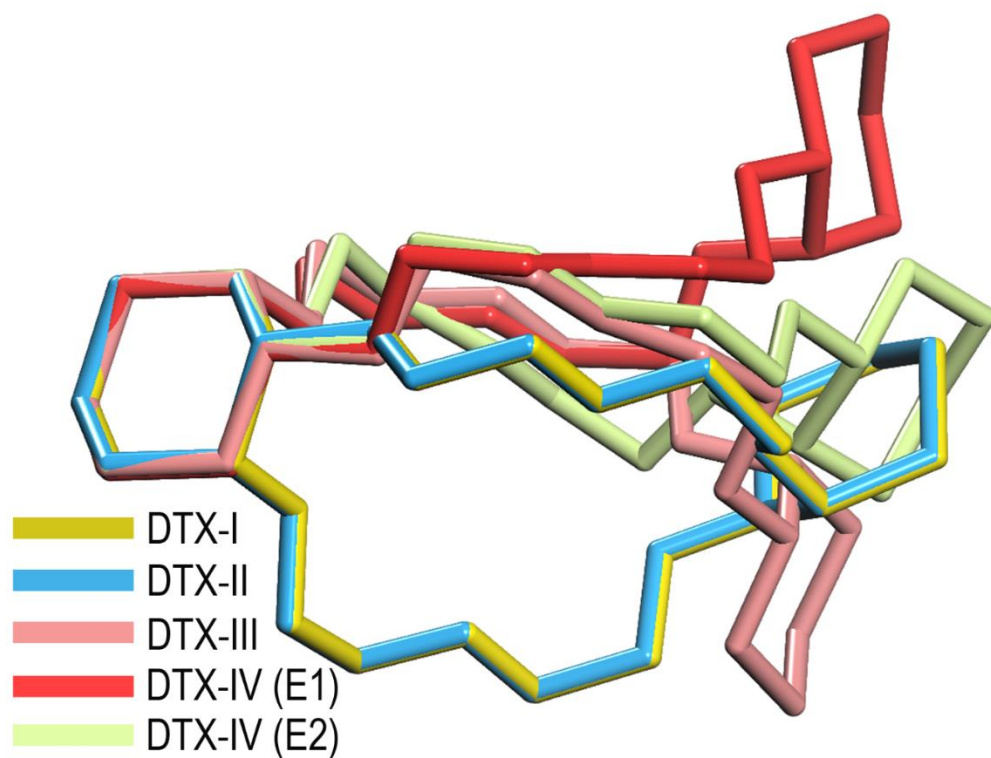

**Fig. S7** Overlap images of DCH in various complexes of DTX. The distinct conformational preferences highlight the flexibility in the system that leads to the formation of complexes with varying stoichiometry and interaction types.

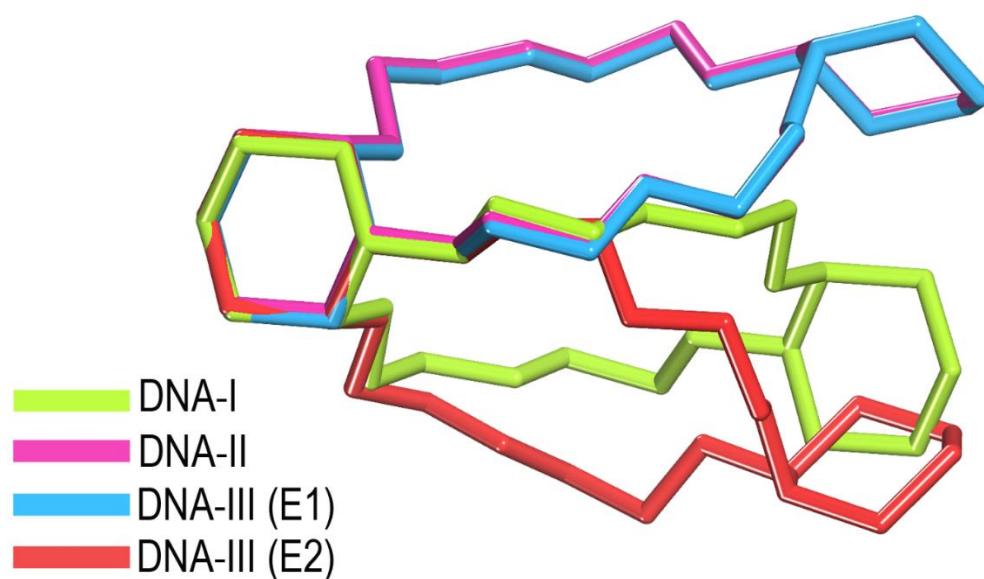

**Fig. S8** Overlap images of DCH in various complexes of DNA.

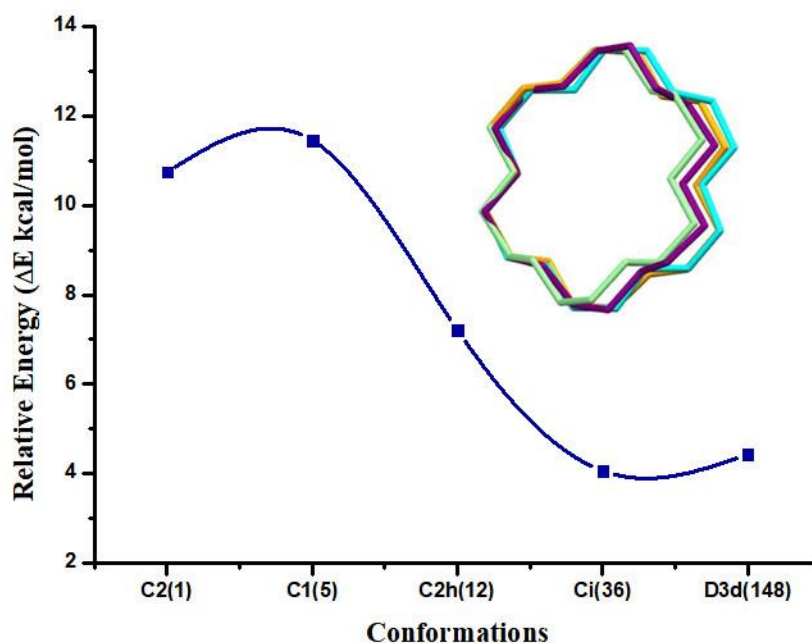

**Fig. S9** Relative energy of various known conformations of 18C6. The numbers in brackets indicate the frequency distribution of various conformations. Structure overlay of several conformations is depicted in the figure. Colour code: Orange-  $D_{3d}$ , Light Green-  $C_i$ , Cyan-  $C_{2h}$ , Purple-  $C_1$ .

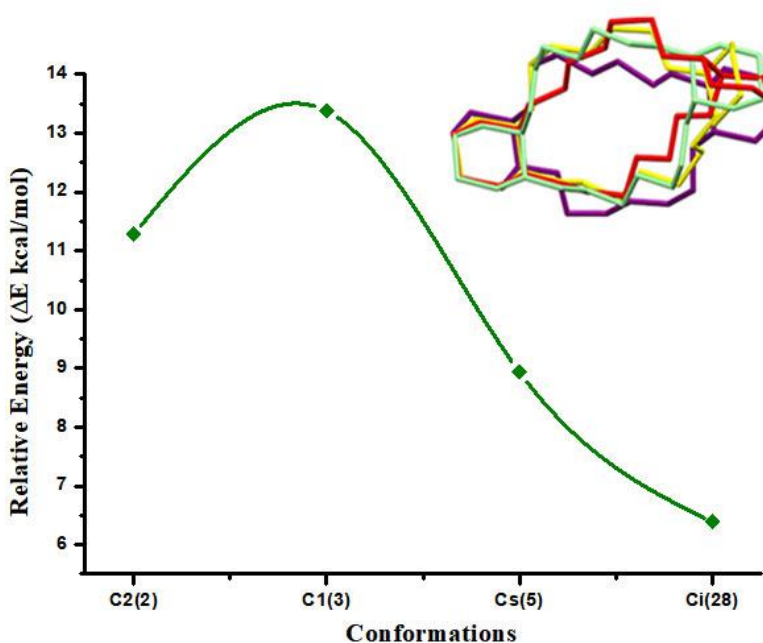

**Fig. S10** Relative energy of various known conformations of DCH. The numbers in brackets indicate the frequency distributions of various conformations. Structure overlay of several conformations is depicted in the figure. Colour code: Light Green-  $C_i$ , Violet-  $C_s$ , Purple-  $C_1$ , Yellow-  $C_2$ .

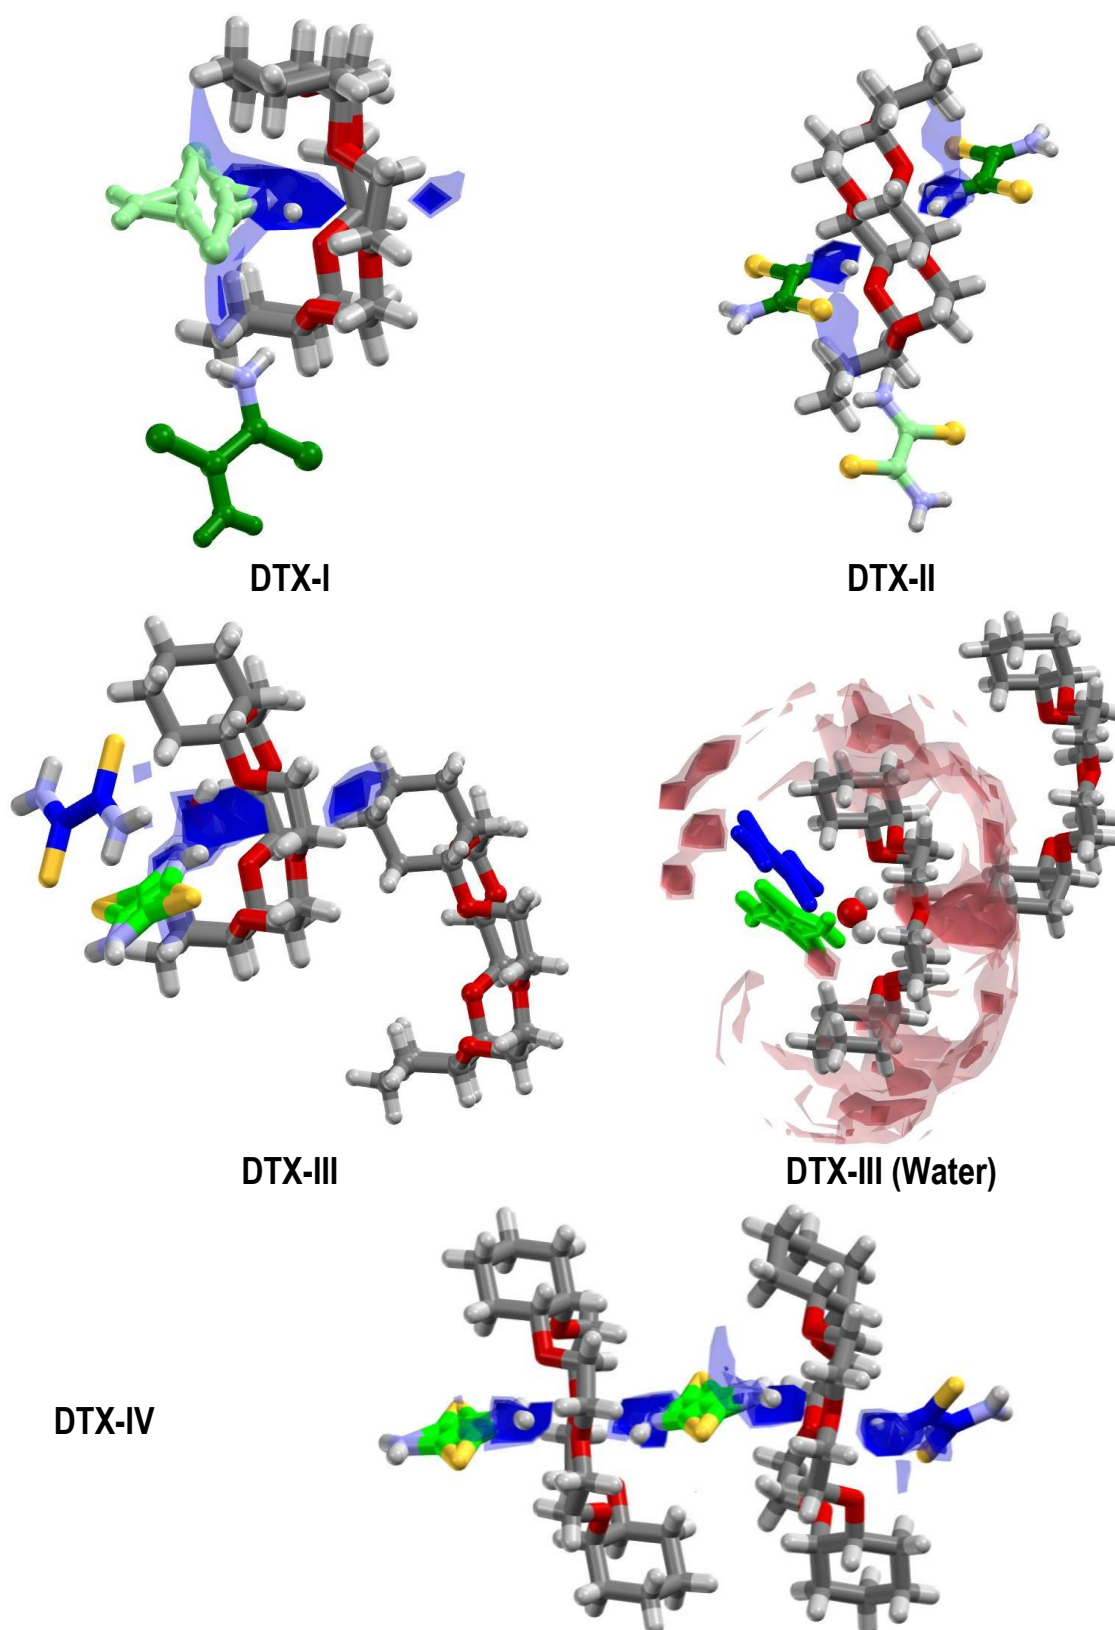

**Fig. S10** The Full Interaction Maps calculated for DTX I – IV. (Symmetry-independent DTX molecules are highlighted in distinct colours)



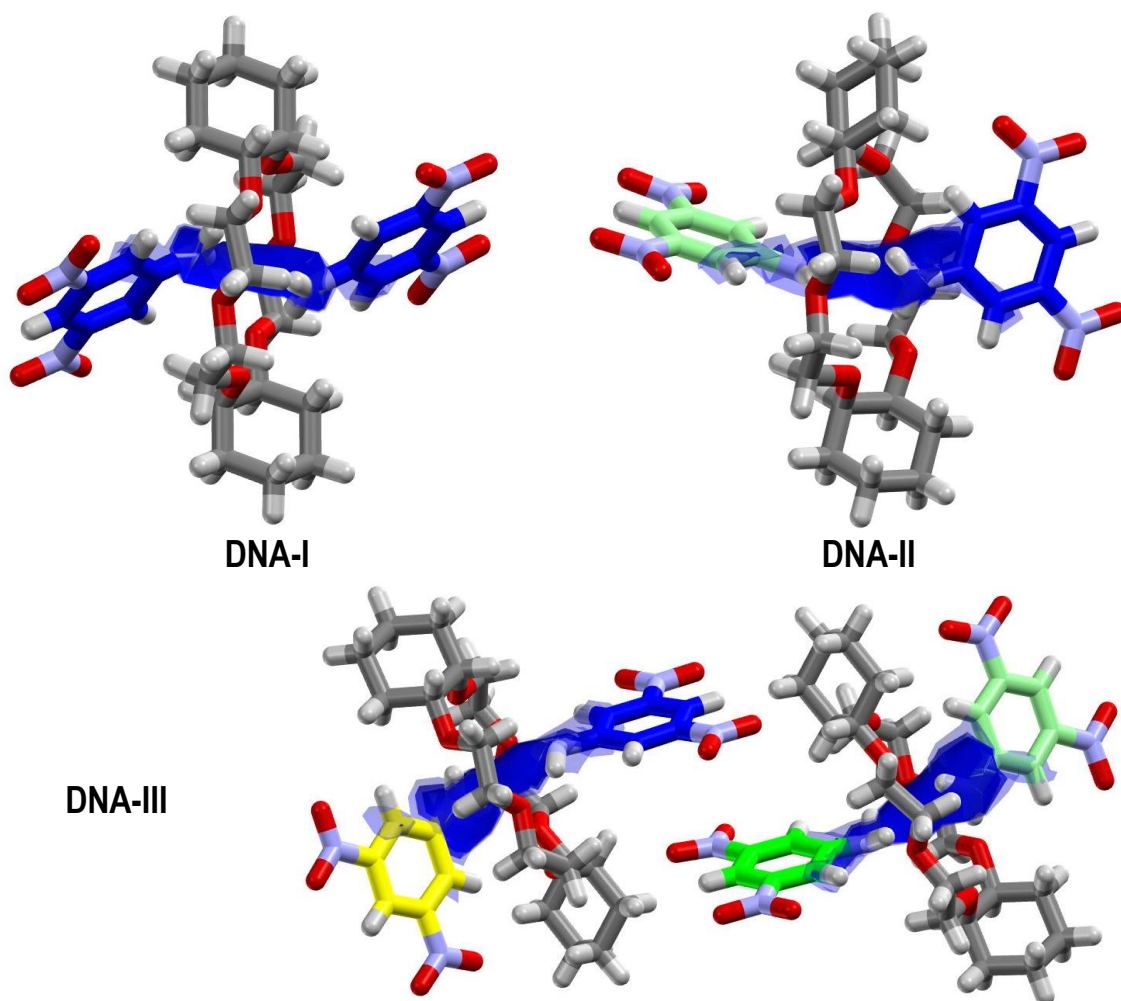

**Fig. S11** The Full Interaction Maps calculated for DNA I – III. (Symmetry-independent DNA molecules are highlighted in distinct colours)

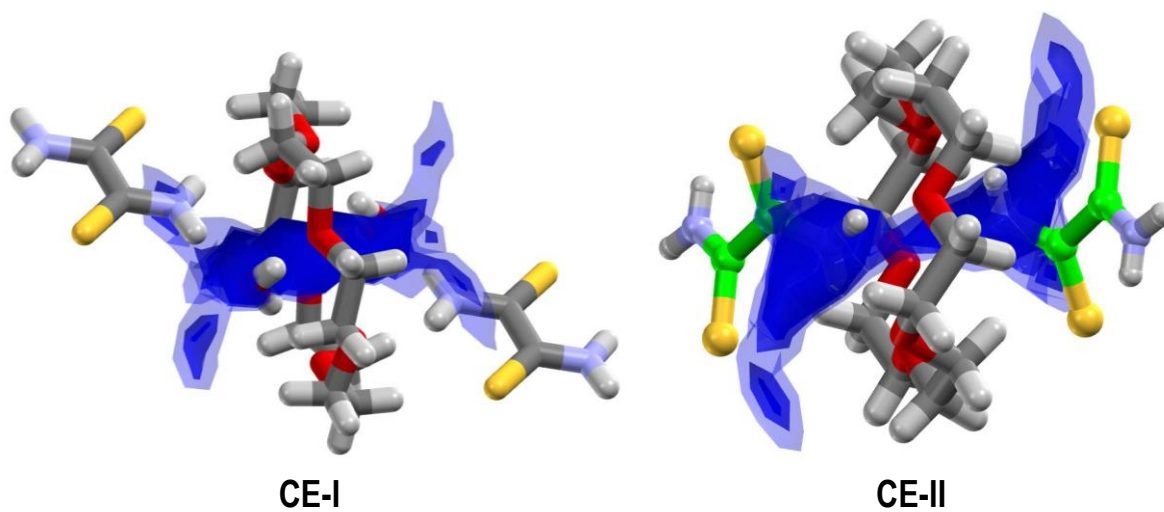

**Fig. S12** The Full Interaction Maps calculated for CE-I and CE-II

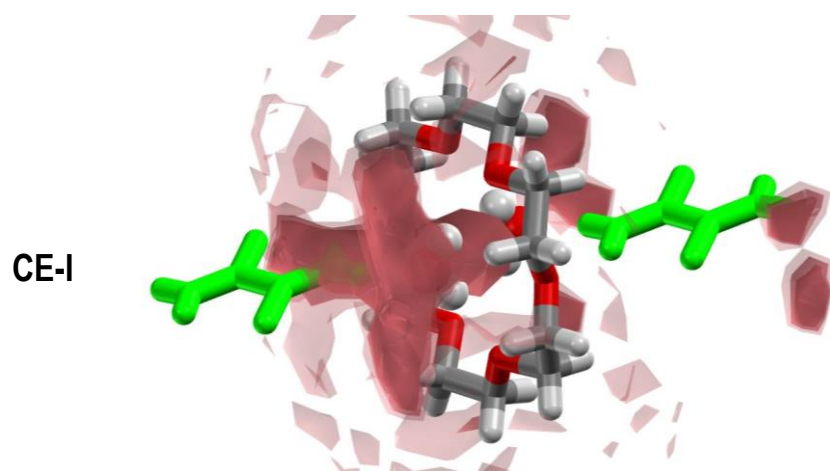

**Fig. S13** The Full Interaction Maps calculated for the crown ether with respect to the lattice water in CE-I.

| Complex | Point Group | Conformation and symmetry elements                                                   |
|---------|-------------|--------------------------------------------------------------------------------------|
| DTX-I   | $C_2$       | <i>cis-syn-cis</i>                                                                   |
|         |             | 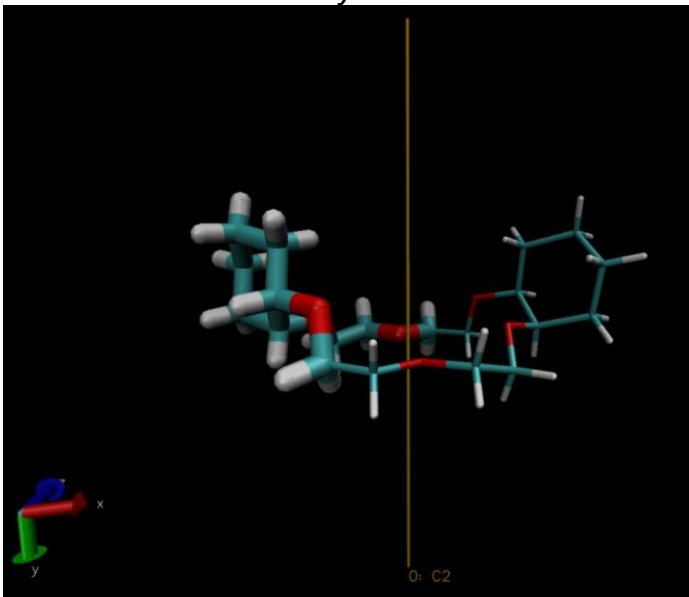  |
| DTX-II  | $C_i$       | <i>cis-anti-cis</i>                                                                  |
|         |             |  |
| DTX-III | $C_s$       | <i>cis-syn-cis</i>                                                                   |

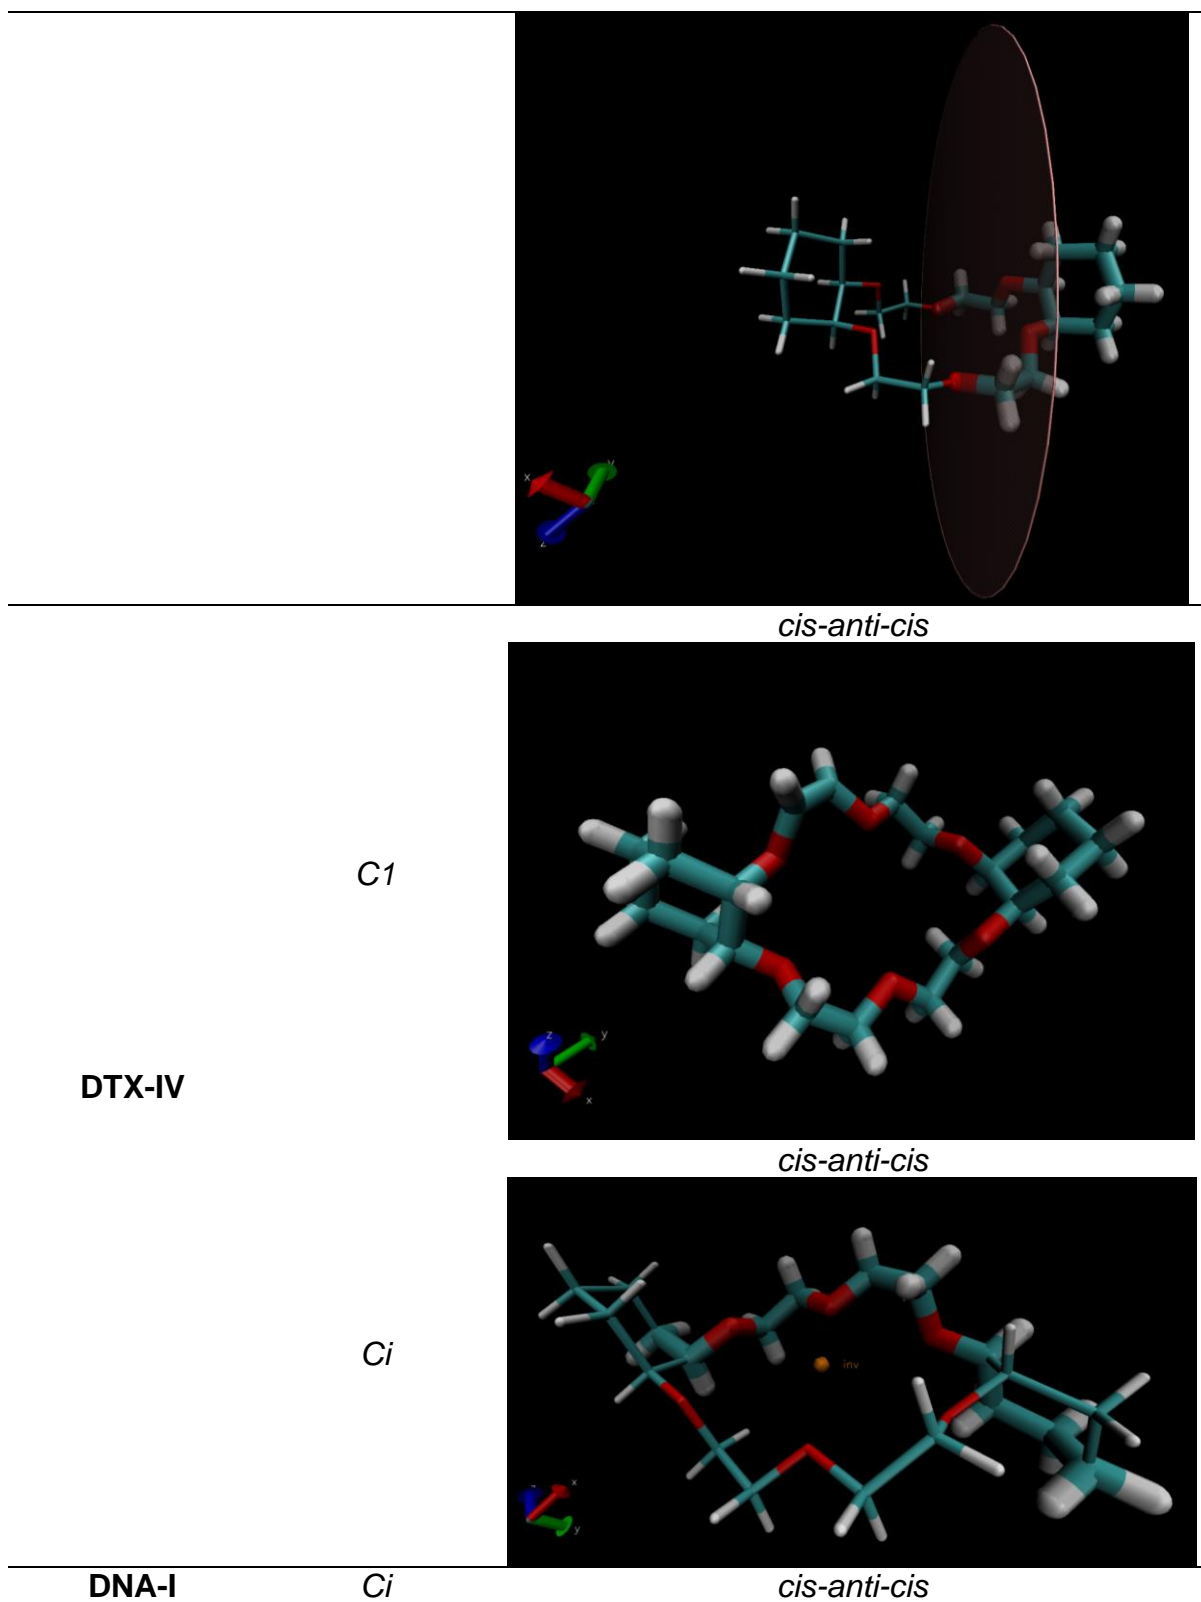

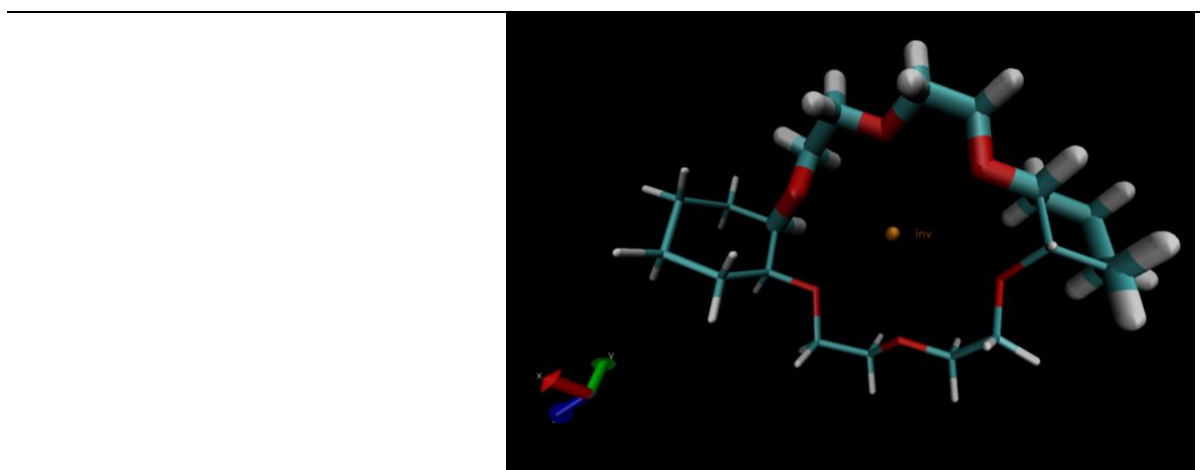

*cis-syn-cis*

DNA-II

C1

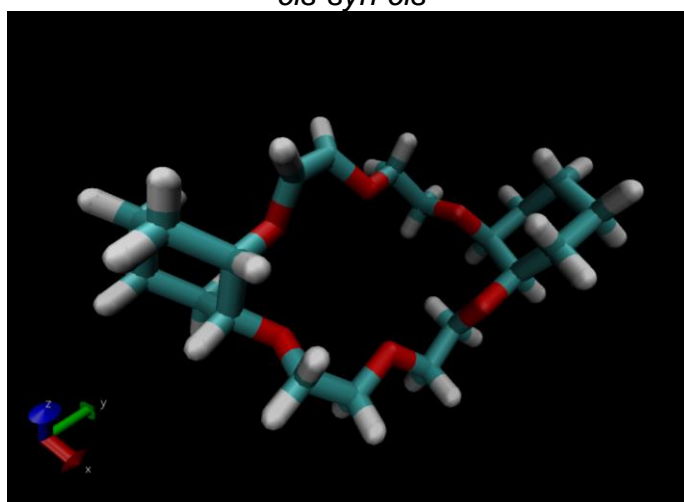

*cis-syn-cis*

DNA-III

C1

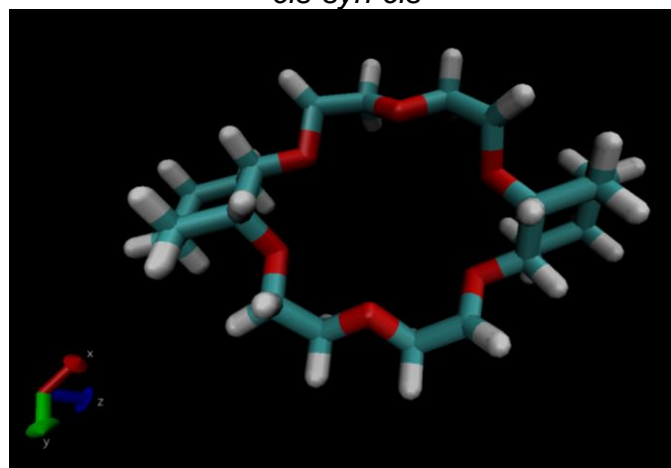

C1

*cis-syn-cis*

---

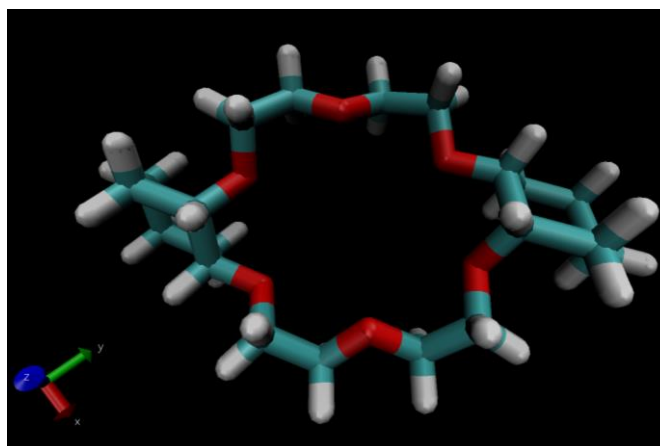

**Fig. S14** The point groups, conformations and the corresponding symmetry elements adopted by the DCH moiety in its complexes. The unique structural fragment is thickened for easy identification

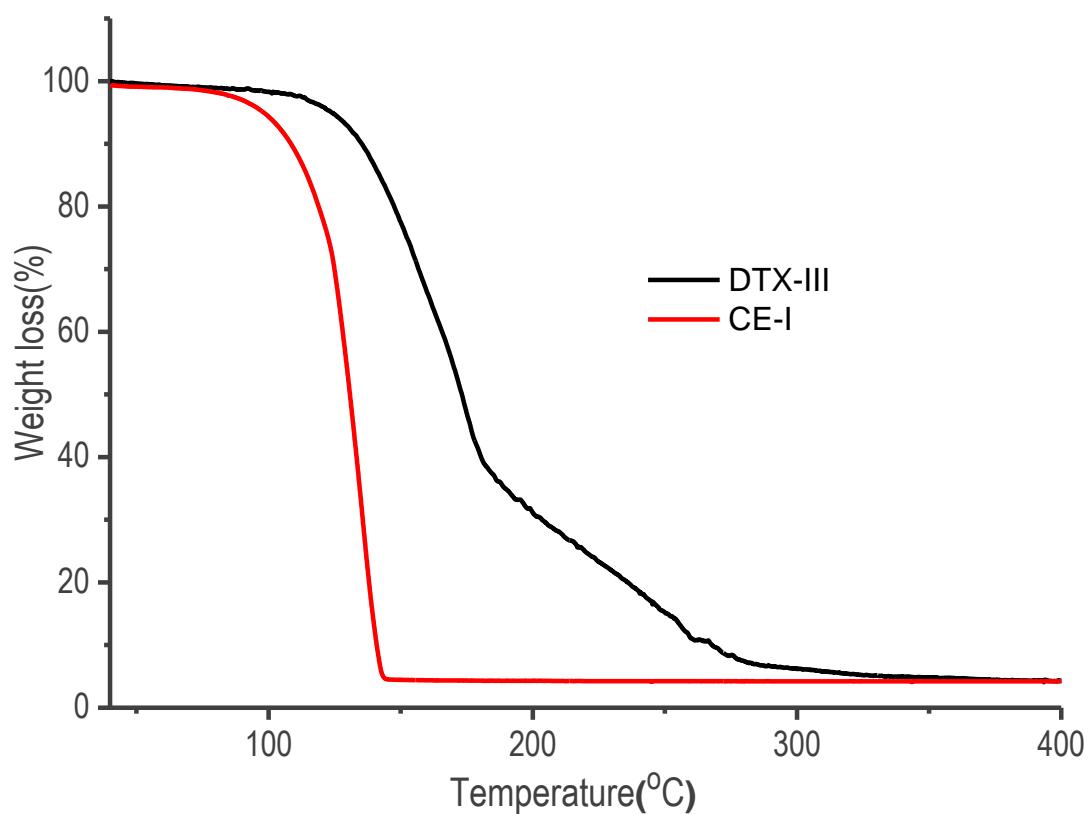

**Fig. S15** The TG thermograms of the hydrated complexes DTX-III and CE-I. It is evident that the loss of the crystal water leads to the dissociation and decomposition of the complexes, highlighting the significance of the water and its interactions in the formation of the complexes.

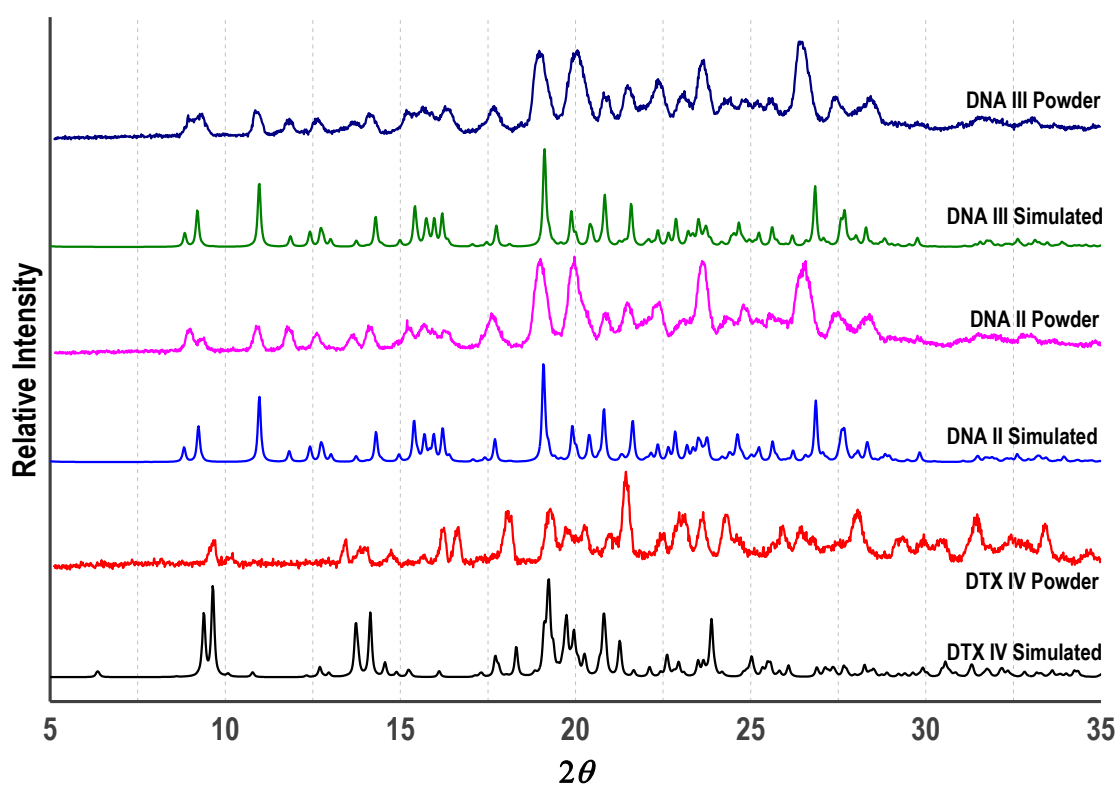

**Fig. S16** The scalability and reproducibility of the complexes were explored by the mechanochemical methods. The powder patterns obtained are identical to the simulated patterns.
